# Supplementary material for: Genetic Evaluation of a Diverse Rice Panel for Direct Seeded Adapted Traits Using Kompetitive Allele Specific Primer Assay
Source: MDPI journal article supplement (doi:10.3390/agronomy12092083), 2022-08-31
Supplement: s1 [file s1]

**Table S1.** Scale for seedling vigor (SES).

| <b>Score</b> | <b>Remarks</b> |
|--------------|----------------|
| 1            | Extra vigorous |
| 3            | Vigorous       |
| 5            | Normal         |
| 7            | Weak           |
| 9            | Very weak      |

**Table S2.** The detailed information on the 106 KASP assays used for molecular characterization of the breeding panel (adapted and modified from Sandhu et al., 2022).

| SNP ID     | Chr | MSU7 position (bp) | QTL /gene                | Reference allele | Positive allele | Negative trait                                     | Positive trait                              |
|------------|-----|--------------------|--------------------------|------------------|-----------------|----------------------------------------------------|---------------------------------------------|
| K_1594302  | 6   | 1594302            | <i>BPH3</i>              | A                | G               | Susceptible                                        | Resistant                                   |
| K_1606487  | 6   | 1606487            | <i>BPH3</i>              | C                | T               |                                                    |                                             |
| K_1631244  | 6   | 1631244            | <i>BPH3</i>              | A                | G               |                                                    |                                             |
| K_1637921  | 6   | 1637921            | <i>BPH3</i>              | A                | G               |                                                    |                                             |
| K_1693594  | 6   | 1693594            | <i>BPH3</i>              | G                | A               |                                                    |                                             |
| K_1738798  | 6   | 1738798            | <i>BPH3</i>              | C                | A               |                                                    |                                             |
| K_5382269  | 4   | 5382269            | <i>BPH17</i>             | G                | C               |                                                    |                                             |
| K_5650499  | 4   | 5650499            | <i>BPH17</i>             | T                | C               |                                                    |                                             |
| K_5847738  | 4   | 5847738            | <i>BPH17</i>             | C                | G               |                                                    |                                             |
| K_6336060  | 4   | 6336060            | <i>BPH17</i>             | G                | A               |                                                    |                                             |
| K_5585652  | 8   | 5585652            | <i>Gm4</i>               | C                | T               |                                                    |                                             |
| K_5585772  | 8   | 5585772            | <i>Gm4</i>               | G                | A               |                                                    |                                             |
| K_5585944  | 8   | 5585944            | <i>Gm4</i>               | G                | A               |                                                    |                                             |
| K_5585994  | 8   | 5585994            | <i>Gm4</i>               | G                | T               |                                                    |                                             |
| K_5586508  | 8   | 5586508            | <i>Gm4</i>               | C                | T               |                                                    |                                             |
| K_10607281 | 12  | 10607281           | <i>Pita2</i>             | T                | C               |                                                    |                                             |
| K_27030975 | 11  | 27030975           | <i>Xa4</i>               | T                | A               |                                                    |                                             |
| K_27183490 | 11  | 27183490           | <i>Xa4</i>               | G                | A               |                                                    |                                             |
| K_27357030 | 11  | 27357030           | <i>Xa4</i>               | C                | T               |                                                    |                                             |
| K_27413024 | 11  | 27413024           | <i>Xa4</i>               | T                | C               |                                                    |                                             |
| K_27468611 | 11  | 27468611           | <i>Xa4</i>               | C                | T               |                                                    |                                             |
| K_27489986 | 11  | 27489986           | <i>Xa4</i>               | G                | T               |                                                    |                                             |
| K_27553861 | 11  | 27553861           | <i>Xa4</i>               | C                | T               |                                                    |                                             |
| K_27584500 | 11  | 27584500           | <i>Xa4</i>               | G                | A               |                                                    |                                             |
| K_27606117 | 11  | 27606117           | <i>Xa4</i>               | C                | A               |                                                    |                                             |
| K_437375   | 5   | 437375             | <i>xa5</i>               | G                | T               |                                                    |                                             |
| K_438206   | 5   | 438206             | <i>xa5</i>               | C                | T               |                                                    |                                             |
| K_438578   | 5   | 438578             | <i>xa5</i>               | C                | T               |                                                    |                                             |
| K_439616   | 5   | 439616             | <i>xa5</i>               | G                | A               |                                                    |                                             |
| K_441684   | 5   | 441684             | <i>xa5</i>               | T                | C               |                                                    |                                             |
| K_21274518 | 11  | 21274518           | <i>Xa21</i>              | A                | G               | no/very low germination under anaerobic conditions | good germination under anaerobic conditions |
| K_21276435 | 11  | 21276435           | <i>Xa21</i>              | T                | C               |                                                    |                                             |
| K_26727222 | 8   | 26727222           | <i>xa13</i>              | G                | C               | less number of nodal roots                         | more number of nodal roots                  |
| K_31579287 | 4   | 31579287           | <i>Xa38</i>              | T                | C               |                                                    |                                             |
| K_31579822 | 4   | 31579822           | <i>Xa38</i>              | T                | C               |                                                    |                                             |
| K_31580379 | 4   | 31580379           | <i>Xa38</i>              | T                | A               |                                                    |                                             |
| K_12253431 | 9   | 12253431           | <i>qAG<sub>9.1</sub></i> | T                | C               |                                                    |                                             |
| K_12253887 | 9   | 12253887           | <i>qAG<sub>9.1</sub></i> | A                | G               |                                                    |                                             |
| K_1198917  | 5   | 1198917            | <i>qNR<sub>5.1</sub></i> | T                | C               | less number of nodal roots                         | more number of nodal roots                  |
| K_1296530  | 5   | 1296530            | <i>qNR<sub>5.1</sub></i> | A                | G               |                                                    |                                             |
| K_1688209  | 5   | 1688209            | <i>qNR<sub>5.1</sub></i> | G                | A               |                                                    |                                             |
| K_1888209  | 5   | 1888209            | <i>qNR<sub>5.1</sub></i> | C                | A               |                                                    |                                             |
| K_5786391  | 4   | 5786391            | <i>qNR<sub>4.1</sub></i> | T                | G               |                                                    |                                             |
| K_5787060  | 4   | 5787060            | <i>qNR<sub>4.1</sub></i> | A                | T               |                                                    |                                             |

|            |    |          |                            |   |   |                                                       |                                                        |
|------------|----|----------|----------------------------|---|---|-------------------------------------------------------|--------------------------------------------------------|
| K_5787840  | 4  | 5787840  | <i>qNR<sub>4.1</sub></i>   | C | G |                                                       |                                                        |
| K_5819155  | 4  | 5819155  | <i>qNR<sub>4.1</sub></i>   | C | T |                                                       |                                                        |
| K_6494690  | 4  | 6494690  | <i>qNR<sub>4.1</sub></i>   | T | C |                                                       |                                                        |
| K_6941654  | 4  | 6941654  | <i>qNR<sub>4.1</sub></i>   | C | T |                                                       |                                                        |
| K_7154131  | 4  | 7154131  | <i>qNR<sub>4.1</sub></i>   | G | A |                                                       |                                                        |
| K_7073586  | 1  | 7073586  | <i>qRHD<sub>1.1</sub></i>  | G | T |                                                       |                                                        |
| K_7081184  | 1  | 7081184  | <i>qRHD<sub>1.1</sub></i>  | C | T |                                                       |                                                        |
| K_8791450  | 1  | 8791450  | <i>qRHD<sub>1.1</sub></i>  | A | G |                                                       |                                                        |
| K_8855279  | 1  | 8855279  | <i>qRHD<sub>1.1</sub></i>  | T | C | Sparse root hairs                                     | Dense root hairs                                       |
| K_8887013  | 1  | 8887013  | <i>qRHD<sub>1.1</sub></i>  | C | T |                                                       |                                                        |
| K_8935224  | 1  | 8935224  | <i>qRHD<sub>1.1</sub></i>  | G | T |                                                       |                                                        |
| K_15997367 | 5  | 15997367 | <i>qRHD<sub>5.1</sub></i>  | A | G |                                                       |                                                        |
| K_2086213  | 8  | 2086213  | <i>qRHD<sub>8.1</sub></i>  | G | T |                                                       |                                                        |
| K_9653331  | 2  | 9653331  | <i>qDTY<sub>2.1</sub></i>  | A | T |                                                       |                                                        |
| K_9780606  | 2  | 9780606  | <i>qDTY<sub>2.1</sub></i>  | C | A |                                                       |                                                        |
| K_30279242 | 3  | 30279242 | <i>qDTY<sub>3.1</sub></i>  | G | T |                                                       |                                                        |
| K_30270860 | 3  | 30270860 | <i>qDTY<sub>3.1</sub></i>  | G | A |                                                       |                                                        |
| K_30738342 | 3  | 30738342 | <i>qDTY<sub>3.1</sub></i>  | G | C | yield penalty under reproductive stage drought stress | Improved yield under reproductive stage drought stress |
| K_30796109 | 3  | 30796109 | <i>qDTY<sub>3.1</sub></i>  | T | A |                                                       |                                                        |
| K_30821108 | 3  | 30821108 | <i>qDTY<sub>3.1</sub></i>  | T | C |                                                       |                                                        |
| K_17464660 | 12 | 17464660 | <i>qDTY<sub>12.1</sub></i> | G | A |                                                       |                                                        |
| K_17486676 | 12 | 17486676 | <i>qDTY<sub>12.1</sub></i> | C | T |                                                       |                                                        |
| K_17489337 | 12 | 17489337 | <i>qDTY<sub>12.1</sub></i> | T | C |                                                       |                                                        |
| K_17537562 | 12 | 17537562 | <i>qDTY<sub>12.1</sub></i> | G | T |                                                       |                                                        |
| K_39538807 | 1  | 39538807 | <i>qGY<sub>1.1</sub></i>   | G | T |                                                       |                                                        |
| K_39538868 | 1  | 39538868 | <i>qGY<sub>1.1</sub></i>   | C | T |                                                       |                                                        |
| K_39610271 | 1  | 39610271 | <i>qGY<sub>1.1</sub></i>   | T | G |                                                       |                                                        |
| K_39612639 | 1  | 39612639 | <i>qGY<sub>1.1</sub></i>   | G | T |                                                       |                                                        |
| K_16734396 | 10 | 16734396 | <i>qGY<sub>10.1</sub></i>  | T | C |                                                       |                                                        |
| K_18666765 | 10 | 18666765 | <i>qGY<sub>10.1</sub></i>  | A | G |                                                       |                                                        |
| K_18703848 | 10 | 18703848 | <i>qGY<sub>10.1</sub></i>  | C | T | low yield under DSR                                   | Improved yield under DSR                               |
| K_18734396 | 10 | 18734396 | <i>qGY<sub>10.1</sub></i>  | T | C |                                                       |                                                        |
| K_18749935 | 10 | 18749935 | <i>qGY<sub>10.1</sub></i>  | T | C |                                                       |                                                        |
| K_18797856 | 10 | 18797856 | <i>qGY<sub>10.1</sub></i>  | A | T |                                                       |                                                        |
| K_18901381 | 10 | 18901381 | <i>qGY<sub>10.1</sub></i>  | G | A |                                                       |                                                        |
| K_19779370 | 10 | 19779370 | <i>qGY<sub>10.1</sub></i>  | C | G |                                                       |                                                        |
| K_19909715 | 10 | 19909715 | <i>qGY<sub>10.1</sub></i>  | G | A |                                                       |                                                        |
| K_20036149 | 10 | 20036149 | <i>qGY<sub>10.1</sub></i>  | C | T |                                                       |                                                        |
| K_456591   | 3  | 456591   | <i>qLDG<sub>3.1</sub></i>  | G | A |                                                       |                                                        |
| K_499461   | 3  | 499461   | <i>qLDG<sub>3.1</sub></i>  | T | C |                                                       |                                                        |
| K_610549   | 3  | 610549   | <i>qLDG<sub>3.1</sub></i>  | C | G |                                                       |                                                        |
| K_648480   | 3  | 648480   | <i>qLDG<sub>3.1</sub></i>  | T | C |                                                       |                                                        |
| K_673659   | 3  | 673659   | <i>qLDG<sub>3.1</sub></i>  | T | C |                                                       |                                                        |
| K_767400   | 3  | 767400   | <i>qLDG<sub>3.1</sub></i>  | G | A |                                                       |                                                        |
| K_1029593  | 3  | 1029593  | <i>qLDG<sub>3.1</sub></i>  | T | C |                                                       |                                                        |
| K_1083767  | 3  | 1083767  | <i>qLDG<sub>3.1</sub></i>  | C | T | susceptible to lodging                                | resistant to lodging                                   |
| K_1111246  | 3  | 1111246  | <i>qLDG<sub>3.1</sub></i>  | G | C |                                                       |                                                        |
| K_1179119  | 3  | 1179119  | <i>qLDG<sub>3.1</sub></i>  | G | C |                                                       |                                                        |
| K_1298111  | 3  | 1298111  | <i>qLDG<sub>3.1</sub></i>  | C | T |                                                       |                                                        |
| K_16279477 | 4  | 16279477 | <i>qLDG<sub>4.1</sub></i>  | T | A |                                                       |                                                        |
| K_16402594 | 4  | 16402594 | <i>qLDG<sub>4.1</sub></i>  | G | A |                                                       |                                                        |
| K_17734727 | 4  | 17734727 | <i>qLDG<sub>4.1</sub></i>  | G | A |                                                       |                                                        |

|            |    |          |               |   |   |                |                             |
|------------|----|----------|---------------|---|---|----------------|-----------------------------|
| K_18522689 | 4  | 18522689 | $qLDG_{4.1}$  | G | A |                |                             |
| K_19027599 | 4  | 19027599 | $qLDG_{4.1}$  | T | G |                |                             |
| K_19221785 | 4  | 19221785 | $qLDG_{4.1}$  | C | T |                |                             |
| K_19760969 | 4  | 19760969 | $qLDG_{4.1}$  | G | A |                |                             |
| K_264232   | 1  | 264232   | $qEUE_{1.1}$  | C | T |                |                             |
| K_628981   | 1  | 628981   | $qEUE_{1.1}$  | C | T |                |                             |
| K_728679   | 1  | 728679   | $qEUE_{1.1}$  | G | T |                |                             |
| K_742759   | 1  | 742759   | $qEUE_{1.1}$  | T | C |                |                             |
| K_780655   | 1  | 780655   | $qEUE_{1.1}$  | G | T | poor emergence | early and uniform emergence |
| K_788995   | 1  | 788995   | $qEUE_{1.1}$  | T | A |                |                             |
| K_4033148  | 11 | 4033148  | $qEUE_{11.1}$ | C | T |                |                             |
| K_4974371  | 11 | 4974371  | $qEUE_{11.1}$ | T | C |                |                             |
| K_5786143  | 11 | 5786143  | $qEUE_{11.1}$ | C | T |                |                             |
| K_6581858  | 11 | 6581858  | $qEUE_{11.1}$ | A | G |                |                             |

**Table S3.** Mean performance of genotypes under DSR for morpho-physiological and quality traits.

| Designation                   | DTF | TN  | PH  | YLD     | SPAD | TGW   | TRR   | MRR   | HRR   | FER% | RL      | AD   | RV   | S A    | Tips  | Forks | Crossings | RSR L | RSR B | SV |
|-------------------------------|-----|-----|-----|---------|------|-------|-------|-------|-------|------|---------|------|------|--------|-------|-------|-----------|-------|-------|----|
| PAU 7180-36-5-0-0-0           | 101 | 322 | 90  | 4315.00 | 41   | 25.30 | 80.49 | 72.02 | 65.65 | 92   | 1187.09 | 0.33 | 0.68 | 88.04  | 7193  | 20774 | 6340      | 0.42  | 0.27  | 3  |
| PAU 7180-8-13-0-0-0           | 110 | 313 | 90  | 5338.38 | 36   | 25.55 | 79.95 | 72.81 | 66.51 | 87   | 1684.37 | 0.37 | 1.19 | 134.17 | 10157 | 29064 | 7835      | 0.42  | 0.43  | 3  |
| PAU 7180-9-17-0-0-0           | 102 | 284 | 98  | 5948.22 | 39   | 27.48 | 81.66 | 70.55 | 56.30 | 91   | 1332.40 | 0.35 | 0.87 | 101.92 | 8744  | 23784 | 7287      | 0.37  | 0.35  | 3  |
| PAU 7180-3-9-0-0-0            | 108 | 308 | 88  | 5793.81 | 35   | 23.08 | 80.32 | 72.74 | 65.19 | 90   | 1268.83 | 0.36 | 0.79 | 91.54  | 8156  | 22211 | 5382      | 0.39  | 0.39  | 5  |
| PAU 7180-3-15-0-0-0           | 108 | 254 | 84  | 5352.17 | 35   | 21.80 | 81.60 | 71.17 | 62.56 | 85   | 1029.50 | 0.34 | 0.62 | 75.32  | 7526  | 18728 | 4705      | 0.36  | 0.38  | 3  |
| PAU 7180-4-2-0-0-0            | 110 | 326 | 86  | 5350.51 | 36   | 24.43 | 80.10 | 71.32 | 62.37 | 88   | 1167.81 | 0.36 | 0.83 | 88.75  | 8709  | 20427 | 6215      | 0.39  | 0.44  | 3  |
| PAU 7180-113-14-0-0-0         | 105 | 332 | 91  | 4791.82 | 40   | 22.97 | 79.84 | 71.21 | 61.19 | 79   | 1260.74 | 0.32 | 0.78 | 99.61  | 13040 | 28646 | 10035     | 0.39  | 0.38  | 5  |
| PAU 7180-5-14-0-0-0           | 108 | 316 | 91  | 5297.04 | 36   | 24.05 | 78.76 | 71.44 | 59.73 | 89   | 1336.39 | 0.33 | 0.83 | 99.81  | 10706 | 25969 | 8691      | 0.40  | 0.41  | 3  |
| PAU 7180-9-15-0-0-0           | 110 | 330 | 88  | 4987.07 | 35   | 24.12 | 81.33 | 71.54 | 63.32 | 89   | 956.61  | 0.32 | 0.56 | 70.01  | 8194  | 18332 | 5998      | 0.38  | 0.45  | 3  |
| PAU 5187-RIL1649-F8           | 99  | 228 | 97  | 6296.48 | 40   | 22.27 | 78.17 | 68.73 | 44.39 | 89   | 1066.34 | 0.33 | 0.46 | 53.91  | 11805 | 21124 | 10980     | 0.41  | 0.40  | 3  |
| PAU 5567-32-3-1-5             | 98  | 256 | 114 | 5395.87 | 33   | 24.68 | 79.59 | 68.48 | 53.19 | 88   | 665.16  | 0.35 | 0.52 | 50.53  | 5388  | 9674  | 2973      | 0.32  | 0.34  | 5  |
| PAU 5729-60-5-4-1             | 96  | 259 | 98  | 5421.52 | 36   | 21.38 | 79.65 | 68.00 | 54.25 | 89   | 2744.45 | 0.31 | 0.82 | 116.55 | 24431 | 50088 | 24496     | 0.40  | 0.38  | 5  |
| RP 6273-HHZ4-DT3-LI1-LI1      | 88  | 238 | 98  | 4945.94 | 35   | 18.70 | 79.18 | 67.71 | 30.82 | 94   | 1943.96 | 0.33 | 0.66 | 92.87  | 25223 | 42535 | 21352     | 0.36  | 0.38  | 3  |
| RP 6314-GSR IR 1-DQ 150-R5-Y1 | 92  | 251 | 102 | 4463.51 | 32   | 20.12 | 80.54 | 66.38 | 33.49 | 89   | 1857.78 | 0.34 | 0.99 | 129.84 | 19442 | 40941 | 14964     | 0.36  | 0.37  | 5  |
| NVSR 2107                     | 95  | 220 | 115 | 5498.57 | 38   | 31.15 | 80.85 | 71.13 | 34.45 | 90   | 2090.10 | 0.33 | 0.86 | 124.54 | 27465 | 49785 | 22970     | 0.59  | 0.55  | 3  |
| PAU 6778-12-1-4-1-1           | 94  | 270 | 111 | 5422.08 | 35   | 19.43 | 80.95 | 68.17 | 48.94 | 88   | 1821.69 | 0.32 | 0.94 | 127.63 | 22086 | 42351 | 16854     | 0.36  | 0.39  | 3  |
| PAU 6456-8-1-1-1-3            | 97  | 250 | 104 | 6077.37 | 38   | 25.18 | 80.86 | 69.46 | 51.05 | 92   | 1921.01 | 0.32 | 1.11 | 144.47 | 20345 | 42305 | 15822     | 0.37  | 0.51  | 3  |
| PAU 6456-8-2-1-1-1            | 98  | 260 | 100 | 6503.83 | 37   | 25.78 | 79.90 | 69.98 | 53.93 | 93   | 1763.64 | 0.32 | 0.95 | 122.14 | 21608 | 37783 | 13468     | 0.42  | 0.42  | 3  |
| PAU 6456-8-2-1-1-2            | 100 | 256 | 99  | 5758.21 | 40   | 26.50 | 80.62 | 69.14 | 45.66 | 93   | 1784.71 | 0.31 | 0.78 | 111.86 | 22394 | 38319 | 14359     | 0.36  | 0.50  | 3  |
| PAU 5533-56-3-1-2-3-1-2       | 96  | 276 | 111 | 2851.80 | 36   | 21.47 | 78.75 | 69.08 | 55.10 | 90   | 2264.50 | 0.35 | 0.87 | 130.12 | 25032 | 48587 | 17782     | 0.35  | 0.44  | 5  |
| PAU 5533-56-3-1-3-1-1-1       | 94  | 263 | 108 | 5231.56 | 36   | 23.93 | 79.11 | 69.06 | 43.57 | 95   | 1982.81 | 0.33 | 0.91 | 127.43 | 23284 | 42118 | 14202     | 0.33  | 0.34  | 3  |
| CR 4116-3-2-1-1-1             | 102 | 254 | 112 | 4922.28 | 36   | 25.02 | 81.89 | 71.40 | 41.93 | 81   | 1908.02 | 0.35 | 1.04 | 126.01 | 19651 | 37596 | 12193     | 0.31  | 0.29  | 3  |
| PR 121                        | 107 | 308 | 85  | 4238.23 | 40   | 22.37 | 81.81 | 71.38 | 64.25 | 91   | 1656.70 | 0.34 | 0.82 | 110.52 | 17015 | 33187 | 10950     | 0.36  | 0.38  | 3  |
| PR 126                        | 88  | 286 | 97  | 5412.15 | 33   | 21.03 | 79.67 | 69.47 | 56.71 | 92   | 1903.20 | 0.32 | 0.78 | 112.43 | 22168 | 39862 | 15974     | 0.38  | 0.35  | 3  |
| PAU 9562-1-1                  | 106 | 318 | 99  | 4296.33 | 37   | 23.00 | 81.04 | 68.90 | 52.53 | 85   | 1828.36 | 0.33 | 0.96 | 132.40 | 16271 | 37821 | 10137     | 0.38  | 0.40  | 3  |
| PAU 9562-2-1                  | 102 | 310 | 104 | 4990.86 | 39   | 21.83 | 78.12 | 68.40 | 55.59 | 88   | 1907.32 | 0.32 | 0.74 | 110.42 | 23584 | 47110 | 19743     | 0.37  | 0.35  | 3  |
| PAU 9562-3-1                  | 103 | 295 | 99  | 4525.96 | 38   | 23.98 | 79.10 | 67.89 | 47.72 | 70   | 1245.78 | 0.37 | 0.67 | 77.32  | 8647  | 20490 | 6730      | 0.41  | 0.37  | 1  |
| PAU 7180-36-5-0-0-0           | 107 | 305 | 97  | 3451.43 | 34   | 21.68 | 79.96 | 68.83 | 58.63 | 82   | 1359.58 | 0.33 | 0.93 | 108.65 | 12617 | 28007 | 10284     | 0.42  | 0.29  | 3  |
| PAU 7180-8-13-0-0-0           | 98  | 279 | 109 | 3870.19 | 35   | 21.95 | 79.64 | 65.77 | 28.48 | 82   | 1111.00 | 0.36 | 0.67 | 79.04  | 8339  | 21263 | 6549      | 0.34  | 0.32  | 3  |

|                       |     |     |     |         |    |       |       |       |       |    |         |      |      |        |       |       |      |      |      |   |
|-----------------------|-----|-----|-----|---------|----|-------|-------|-------|-------|----|---------|------|------|--------|-------|-------|------|------|------|---|
| PAU 7180-9-17-0-0-0   | 100 | 311 | 94  | 1720.57 | 36 | 22.10 | 78.68 | 65.69 | 54.24 | 73 | 1279.02 | 0.34 | 0.75 | 92.75  | 11780 | 27193 | 8923 | 0.34 | 0.34 | 3 |
| PAU 7180-3-9-0-0-0    | 97  | 325 | 88  | 3156.48 | 35 | 18.73 | 81.59 | 67.76 | 57.14 | 74 | 1693.66 | 0.33 | 0.61 | 77.10  | 10828 | 24244 | 9394 | 0.37 | 0.37 | 3 |
| PAU 7180-3-15-0-0-0   | 98  | 243 | 100 | 3123.69 | 36 | 19.90 | 80.41 | 63.07 | 35.83 | 78 | 1261.51 | 0.39 | 1.08 | 107.20 | 9340  | 23898 | 7348 | 0.38 | 0.31 | 3 |
| PAU 7180-4-2-0-0-0    | 99  | 278 | 112 | 3383.39 | 32 | 25.02 | 79.85 | 69.76 | 34.96 | 83 | 1104.30 | 0.39 | 0.87 | 86.57  | 6759  | 18703 | 5477 | 0.31 | 0.49 | 3 |
| PAU 7180-113-14-0-0-0 | 100 | 309 | 100 | 2969.56 | 35 | 23.65 | 79.82 | 56.18 | 35.99 | 78 | 1242.59 | 0.36 | 0.91 | 102.18 | 9916  | 26026 | 8798 | 0.40 | 0.44 | 3 |
| PAU 7180-5-14-0-0-0   | 106 | 278 | 132 | 1983.77 | 36 | 17.95 | 79.49 | 51.34 | 57.87 | 77 | 1535.12 | 0.38 | 0.85 | 108.48 | 9632  | 30137 | 8618 | 0.42 | 0.43 | 3 |
| PAU 7180-9-15-0-0-0   | 98  | 286 | 85  | 3074.39 | 39 | 22.89 | 79.30 | 63.39 | 44.40 | 75 | 1378.16 | 0.34 | 0.68 | 82.59  | 6908  | 18912 | 5774 | 0.39 | 0.35 | 3 |

---

DTF: days to 50% flowering (days), TN: tiller number (m<sup>-2</sup>), PH: plant height (cm), YLD: yield (kg ha<sup>-1</sup>), SPD: Soil Plant Analysis Development Meter Value (nmol cm<sup>-1</sup>), TGW: thousand grain weight (gm), TRR: total rice recovery (%), MRR: milled rice recovery (%), HRR: head rice recovery (%), FER %: Spikelet fertility (%), RL: root length (cm), AD: average diameter (mm), RV: root volume (cm<sup>3</sup>), RSR L: root shoot ratio (length), RSR B: root shoot ratio (biomass), SV: seedling vigor.

**Table S4:** Mean performance of genotypes under TPR for morpho-physiological and quality traits.

| SR NO                         | DTF | TN  | PH  | YLD     | SPAD | TGW   | TRR   | MRR   | HRR   | FER% | RL      | AD   | RV   | S A    | Tips  | Forks | Crossings | RSR L | RSR B | SV |
|-------------------------------|-----|-----|-----|---------|------|-------|-------|-------|-------|------|---------|------|------|--------|-------|-------|-----------|-------|-------|----|
| PAU 7180-36-5-0-0-0           | 106 | 318 | 95  | 5452.25 | 39   | 25.20 | 79.78 | 52.49 | 65.52 | 90   | 989.42  | 0.40 | 0.99 | 114.75 | 7691  | 24155 | 16407     | 0.43  | 0.23  | 3  |
| PAU 7180-8-13-0-0-0           | 106 | 333 | 95  | 6710.59 | 40   | 29.37 | 78.91 | 54.14 | 63.90 | 88   | 1395.31 | 0.43 | 1.56 | 140.34 | 10728 | 31546 | 21601     | 0.32  | 0.28  | 3  |
| PAU 7180-9-17-0-0-0           | 104 | 311 | 100 | 6412.15 | 38   | 27.72 | 81.00 | 54.36 | 58.92 | 93   | 1235.30 | 0.36 | 1.32 | 125.43 | 9301  | 26788 | 18317     | 0.39  | 0.29  | 3  |
| PAU 7180-3-9-0-0-0            | 108 | 314 | 93  | 5741.60 | 38   | 30.18 | 79.67 | 54.93 | 60.13 | 88   | 1189.79 | 0.37 | 1.41 | 122.59 | 9440  | 25593 | 16748     | 0.37  | 0.28  | 5  |
| PAU 7180-3-15-0-0-0           | 107 | 300 | 94  | 6186.94 | 36   | 27.32 | 80.94 | 54.13 | 61.05 | 85   | 968.34  | 0.36 | 0.97 | 115.97 | 7932  | 20427 | 13770     | 0.35  | 0.29  | 3  |
| PAU 7180-4-2-0-0-0            | 109 | 305 | 93  | 5864.29 | 39   | 28.08 | 79.69 | 53.89 | 59.74 | 89   | 1101.01 | 0.33 | 1.04 | 101.70 | 8876  | 20970 | 14538     | 0.33  | 0.24  | 5  |
| PAU 7180-113-14-0-0-0         | 109 | 339 | 95  | 6586.65 | 39   | 25.52 | 79.77 | 52.64 | 61.85 | 81   | 1199.52 | 0.39 | 1.32 | 161.01 | 12911 | 28390 | 20687     | 0.39  | 0.25  | 5  |
| PAU 7180-5-14-0-0-0           | 105 | 291 | 98  | 6493.06 | 36   | 28.97 | 78.17 | 53.57 | 61.40 | 87   | 1179.05 | 0.44 | 1.37 | 135.51 | 10600 | 27064 | 19706     | 0.37  | 0.28  | 3  |
| PAU 7180-9-15-0-0-0           | 110 | 288 | 95  | 5867.28 | 37   | 29.57 | 80.71 | 55.14 | 62.92 | 85   | 900.89  | 0.39 | 1.27 | 131.53 | 8417  | 21160 | 14169     | 0.35  | 0.30  | 3  |
| PAU 5187-RIL1649-F8           | 105 | 277 | 100 | 6718.90 | 41   | 25.13 | 77.46 | 51.30 | 62.63 | 87   | 926.62  | 0.35 | 1.08 | 115.89 | 13766 | 25539 | 19097     | 0.37  | 0.22  | 3  |
| PAU 5567-32-3-1-5             | 100 | 253 | 108 | 6575.50 | 35   | 25.85 | 79.17 | 52.51 | 54.45 | 88   | 577.94  | 0.40 | 1.24 | 88.42  | 5451  | 11734 | 7314      | 0.30  | 0.25  | 1  |
| PAU 5729-60-5-4-1             | 100 | 285 | 98  | 6383.59 | 37   | 23.58 | 78.52 | 51.05 | 60.78 | 91   | 1718.49 | 0.39 | 1.39 | 151.47 | 24593 | 50427 | 40321     | 0.40  | 0.30  | 3  |
| RP 6273-HHZ4-DT3-LI1-LI1      | 92  | 262 | 106 | 6581.45 | 38   | 20.88 | 77.97 | 49.43 | 56.37 | 94   | 1659.24 | 0.36 | 1.25 | 126.82 | 26378 | 44549 | 35484     | 0.31  | 0.24  | 3  |
| RP 6314-GSR IR 1-DQ 150-R5-Y1 | 100 | 261 | 106 | 6652.89 | 37   | 28.20 | 80.31 | 54.26 | 56.56 | 88   | 1660.32 | 0.43 | 1.61 | 152.61 | 19030 | 41200 | 30871     | 0.34  | 0.32  | 3  |
| NVSR 2107                     | 94  | 272 | 121 | 7182.57 | 39   | 32.68 | 80.58 | 56.63 | 38.52 | 85   | 1922.61 | 0.40 | 2.04 | 151.48 | 27829 | 51423 | 40003     | 0.34  | 0.41  | 3  |
| PAU 6778-12-1-4-1-1           | 102 | 274 | 115 | 6622.74 | 39   | 26.38 | 80.91 | 53.65 | 59.81 | 90   | 1717.46 | 0.39 | 1.67 | 134.27 | 22531 | 41784 | 32315     | 0.37  | 0.32  | 3  |
| PAU 6456-8-1-1-1-3            | 102 | 256 | 106 | 7047.72 | 40   | 28.60 | 81.45 | 55.02 | 58.48 | 90   | 1714.64 | 0.37 | 1.89 | 145.37 | 20450 | 41369 | 30733     | 0.39  | 0.32  | 3  |
| PAU 6456-8-2-1-1-1            | 101 | 293 | 106 | 7070.07 | 40   | 27.85 | 79.08 | 53.47 | 58.37 | 92   | 1611.31 | 0.38 | 1.66 | 128.62 | 22048 | 38719 | 28197     | 0.40  | 0.42  | 3  |
| PAU 6456-8-2-1-1-2            | 101 | 264 | 109 | 7003.56 | 38   | 25.72 | 80.03 | 52.87 | 56.70 | 91   | 1605.19 | 0.34 | 1.45 | 130.57 | 22527 | 38111 | 28346     | 0.29  | 0.34  | 1  |
| PAU 5533-56-3-1-2-3-1-2       | 98  | 275 | 117 | 5430.81 | 40   | 24.27 | 77.81 | 51.04 | 60.52 | 89   | 1956.65 | 0.41 | 1.80 | 154.51 | 26296 | 50666 | 38442     | 0.34  | 0.28  | 3  |
| PAU 5533-56-3-1-3-1-1-1       | 102 | 310 | 117 | 6551.28 | 39   | 23.60 | 77.80 | 50.70 | 54.75 | 95   | 1758.55 | 0.39 | 1.71 | 143.48 | 23209 | 42766 | 31874     | 0.35  | 0.29  | 3  |
| CR 4116-3-2-1-1-1             | 102 | 264 | 123 | 6631.50 | 38   | 26.92 | 81.32 | 54.12 | 48.43 | 90   | 1508.75 | 0.38 | 1.52 | 159.56 | 20134 | 38883 | 28103     | 0.29  | 0.32  | 1  |
| PR 121                        | 107 | 322 | 94  | 6890.17 | 40   | 25.98 | 81.11 | 53.55 | 65.24 | 89   | 1444.68 | 0.42 | 1.61 | 129.43 | 17413 | 34817 | 25394     | 0.37  | 0.31  | 3  |
| PR 126                        | 93  | 272 | 97  | 7333.84 | 39   | 22.22 | 79.29 | 50.75 | 62.03 | 89   | 1669.51 | 0.37 | 1.48 | 146.33 | 22975 | 40585 | 30558     | 0.33  | 0.21  | 3  |
| PAU 9562-1-1                  | 107 | 326 | 102 | 5268.23 | 40   | 22.77 | 80.48 | 51.62 | 61.35 | 92   | 1562.51 | 0.40 | 1.54 | 160.22 | 16164 | 37054 | 26662     | 0.33  | 0.38  | 3  |
| PAU 9562-2-1                  | 106 | 259 | 102 | 5647.99 | 38   | 23.50 | 78.02 | 50.76 | 60.75 | 92   | 1714.39 | 0.35 | 1.22 | 141.57 | 23779 | 48717 | 37342     | 0.35  | 0.24  | 3  |
| PAU 9562-3-1                  | 102 | 299 | 103 | 5243.37 | 42   | 24.07 | 78.69 | 51.38 | 57.84 | 88   | 1031.76 | 0.35 | 1.00 | 111.48 | 9913  | 23368 | 15874     | 0.31  | 0.33  | 1  |

|                       |     |     |     |         |    |       |       |       |       |    |         |      |      |        |       |       |       |      |      |   |
|-----------------------|-----|-----|-----|---------|----|-------|-------|-------|-------|----|---------|------|------|--------|-------|-------|-------|------|------|---|
| PAU 7180-36-5-0-0-0   | 101 | 260 | 109 | 6215.50 | 39 | 25.63 | 78.88 | 52.26 | 59.32 | 86 | 1142.26 | 0.37 | 1.07 | 111.39 | 12517 | 27818 | 20261 | 0.27 | 0.39 | 3 |
| PAU 7180-8-13-0-0-0   | 99  | 248 | 114 | 5333.73 | 39 | 23.09 | 79.48 | 51.28 | 48.70 | 86 | 1108.97 | 0.39 | 1.25 | 109.81 | 9007  | 23808 | 16545 | 0.25 | 0.32 | 3 |
| PAU 7180-9-17-0-0-0   | 107 | 297 | 108 | 3685.80 | 36 | 19.81 | 78.13 | 48.97 | 62.45 | 84 | 1023.02 | 0.41 | 1.41 | 127.03 | 13476 | 29525 | 21028 | 0.28 | 0.18 | 3 |
| PAU 7180-3-9-0-0-0    | 105 | 302 | 101 | 5617.08 | 37 | 19.82 | 79.86 | 49.84 | 61.74 | 88 | 1658.75 | 0.36 | 1.40 | 88.96  | 11868 | 25725 | 18180 | 0.26 | 0.36 | 3 |
| PAU 7180-3-15-0-0-0   | 100 | 309 | 113 | 5041.56 | 39 | 24.22 | 79.63 | 51.92 | 50.10 | 88 | 1089.57 | 0.36 | 1.17 | 107.96 | 10354 | 26786 | 18558 | 0.22 | 0.41 | 3 |
| PAU 7180-4-2-0-0-0    | 96  | 255 | 124 | 5469.13 | 35 | 22.18 | 78.56 | 50.37 | 49.09 | 87 | 1072.43 | 0.38 | 1.30 | 93.87  | 7663  | 21321 | 14327 | 0.25 | 0.28 | 3 |
| PAU 7180-113-14-0-0-0 | 94  | 320 | 106 | 5885.57 | 37 | 23.21 | 78.00 | 50.60 | 52.19 | 87 | 2346.31 | 0.38 | 1.44 | 113.55 | 10553 | 27549 | 19590 | 0.26 | 0.27 | 3 |
| PAU 7180-5-14-0-0-0   | 101 | 305 | 109 | 4403.05 | 38 | 18.40 | 79.07 | 48.73 | 54.66 | 87 | 1311.95 | 0.38 | 1.15 | 136.43 | 10795 | 33396 | 23432 | 0.25 | 0.33 | 3 |
| PAU 7180-9-15-0-0-0   | 101 | 322 | 96  | 5622.88 | 39 | 22.81 | 79.17 | 50.99 | 43.16 | 85 | 1258.45 | 0.37 | 0.85 | 109.34 | 7461  | 20611 | 18202 | 0.29 | 0.37 | 3 |

---

DTF: days to 50% flowering (days), TN: tiller number (m<sup>-2</sup>), PH: plant height (cm), YLD: yield (kg ha<sup>-1</sup>), SPD: Soil Plant Analysis Development Meter Value (nmol cm<sup>-1</sup>), TGW: thousand grain weight (gm), TRR: total rice recovery (%), MRR: milled rice recovery (%), HRR: head rice recovery (%), FER %: Spikelet fertility (%), RL: root length (cm), AD: average diameter (mm), RV: root volume (cm<sup>3</sup>), RSR L: root shoot ratio (length), RSR B: root shoot ratio (biomass), SV: seedling vigor.
